## Title page

**Title:** The Meta-Position of Phe<sup>4</sup> in Leu-enkephalin Regulates Potency, Selectivity, Functional Activity, and Signaling Bias at the Delta and Mu Opioid Receptors

**Authors:** Robert J. Cassell<sup>1,†</sup>, Krishna K. Sharma<sup>4,†</sup>, Hongyu Su<sup>1</sup>, Benjamin R. Cummins<sup>5</sup>, Haoyue Cui<sup>6</sup>, Kendall L. Mores<sup>1</sup>, Ryan A. Altman<sup>4,‡</sup>, Richard M. van Rijn<sup>1,2,3,‡</sup>

**Author Affiliations:** <sup>1</sup>Department of Medicinal Chemistry and Molecular Pharmacology, College of Pharmacy, Purdue University, <sup>2</sup>Purdue Institute for Drug Discovery, Purdue University, <sup>3</sup>Purdue Institute for Integrative Neuroscience, Purdue University, <sup>4</sup>Department of Medicinal Chemistry, The University of Kansas, <sup>5</sup>Department of Chemistry, Purdue University, <sup>6</sup>College of Wuya, Shenyang Pharmaceutical University, <sup>†</sup>contributed equally to this work

### Corresponding authors:

<sup>‡</sup>Richard M. van Rijn, Department of Medicinal Chemistry and Molecular Pharmacology, College of Pharmacy, Purdue University, West Lafayette, Indiana 47907 (Phone: 765-494-6461; Email: [rvanrijn@purdue.edu](mailto:rvanrijn@purdue.edu)), Ryan A. Altman, Department of Medicinal Chemistry, The University of Kansas, Lawrence, Kansas 66045 (Phone: 785-864-6234; email [raaltman@ku.edu](mailto:raaltman@ku.edu))

**Key words:** Leu-enkephalin; beta-arrestin; mu opioid receptor; delta opioid receptor; biased signaling,

**Abstract:** 193; **Introduction:** 696; **Figures:** 4; **Table:** 3; **Supplemental files:** 3; **References:** 42

## TOC FIGURE

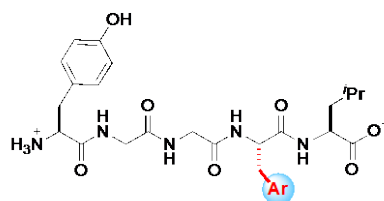

- High Potency and Functional Activity for  $\delta$ OR
- Distinct  $\beta$ -Arr Profiles at  $\delta$ OR and  $\mu$ OR
- Improved Plasma Stability and Half-Life

## Abstract

Activation of an opioid receptor can trigger two distinct pathways (G protein coupling and arrestin recruitment) that differentially regulate a host of desired and undesired pharmacological effects. To explore the pharmacology of these pathways and to differentiate desired pharmacological effects from undesired side effects, “biased” ligands, those that selectively activate one pathway over the other, serve as useful tool compounds. Though an extensive array of biased ligands have been developed for exploring  $\mu$ -opioid receptor pharmacology, few studies have explored biased ligands for the  $\delta$ -opioid receptor, which is not associated with the detrimental side effects mediated by the  $\mu$ -opioid receptor.

Herein, we explore the Phe<sup>4</sup> position of the endogenous  $\delta$ -opioid receptor ligand, Leu-enkephalin (Tyr-Gly-Gly-Phe-Leu). Substitution of the meta-position of Phe<sup>4</sup> of Leu-enkephalin provides high-affinity ligands with varying levels of selectivity and bias at both the  $\delta$ -opioid receptor and  $\mu$ -opioid receptor, while substitution with piperidine derivatives produced lower-affinity ligands with good biases at both receptors. Further, Phe<sup>4</sup> substitution also improves peptide stability relative to Leu-enkephalin. Overall, these favorable substitutions to the meta-position of Phe<sup>4</sup> might be combined with other modifications to Leu-enkephalin to deliver improved ligands with finely tuned potency, selectivity, bias and drug-like properties.

## Introduction

Leu-enkephalin (Tyr-Gly-Gly-Phe-Leu, Leu-enkephalin) is an endogenous opioid peptide produced in vertebrate species, including rodents, primates and humans<sup>1-4</sup> that results from decomposition of proenkephalin or dynorphin.<sup>5</sup> Pharmacologically, Leu-enkephalin selectively agonizes the delta opioid receptor ( $\delta$ OR) with moderate preference over the mu opioid receptor ( $\mu$ OR), but does not significantly interact with the kappa opioid receptor.<sup>6</sup> As a neurotransmitter in pain circuits, Leu-enkephalin possesses antinociceptive properties,<sup>7</sup> whereas peripherally, the peptide demonstrates cardiovascular effects<sup>8</sup> and as such, Leu-enkephalin has served as a lead for roughly four decades worth of medicinal chemistry campaigns aimed at developing analogs that interact with excellent potency and selectivity for  $\delta$  and  $\mu$ ORs.<sup>9</sup> These important studies have historically assessed functional activity G protein-coupled signaling pathways, initially by evaluating inhibition of electrically evoked mouse vas deferens contractions,<sup>10</sup> and later through [<sup>35</sup>S]GTPyS, luminescence and bioluminescence assays.<sup>11</sup> While quantification of G protein activity is well established, techniques to quantitatively measure  $\beta$ -arrestin recruitment have only begun to emerge around 2002.<sup>12-14</sup> As such, relatively few studies have systematically assessed this alternate pathway despite its important roles in regulating OR desensitization, and purported promotion of  $\beta$ -arrestin-dependent signal transduction through the scaffolding of various kinases.<sup>15</sup> An increasing number of studies have implicated  $\delta$ OR mediated  $\beta$ -arrestin recruitment with various (patho)physiological effects, ranging from tolerance,<sup>16</sup> alcohol intake<sup>17,18</sup> and  $\delta$ OR agonist-induced seizures.<sup>16</sup> To minimize these adverse effects, the development of “biased” ligands that can selectively activate the G protein pathway, without engaging the  $\beta$ -arrestin-associated pathways,<sup>19</sup> may provide a key set of pharmacological tools for reevaluating the drugability of  $\delta$ OR for several disease states.

The physiological responses of enkephalins in tempering pain signaling and providing cardioprotection makes them an interesting therapeutic option particularly at the  $\delta$ OR, as in contrast to  $\mu$ OR, this OR subtype is generally not associated with respiratory depression or the development of psychological dependence.<sup>20–23</sup> However, rapid metabolism and poor CNS penetration limit the use of exogenous Leu-enkephalin as a drug. To extend the half-life of Leu-enkephalin, enkephalinase inhibitors have been developed that provide increased antinociceptive potency/duration of natively expressed Leu-enkephalin.<sup>24</sup> Limitingly, these inhibitors do not however modulate the inherent pharmacological profile of Leu-enkephalin as a relatively unbiased  $\delta$ OR peptide. Though several  $\delta$ OR selective synthetic biased ligands have been identified (**Figure 1**),<sup>25–27</sup> and despite the drive to promote G protein biased OR agonists as novel therapies, reports of  $\delta$ OR selective peptide-based biased ligands remain limited. Rubiscolin-5 and -6 are naturally occurring peptides ( $\beta$ -arrestin 2 efficacy = 15% and 20%, respectively;  $\delta$ OR bias factor = 2.0), which have micromolar potencies<sup>28</sup> whereas the synthetic peptides, aza- $\beta$ -homoleucine-enkephalin ( $\beta$ -arrestin 2 efficacy = 64%;  $\delta$ OR bias factor = 5.2)<sup>26</sup> and Dmt-Tic analogs,<sup>29</sup> have nanomolar potencies, but more efficaciously recruit  $\beta$ -arrestin 2 than the rubiscolins (UFP-512: cAMP potency 0.4 nM,  $\beta$ -arrestin 2 potency = 20 nM, efficacy = 60%).<sup>26,29,30</sup> Additionally, these biased compounds, including aza- $\beta$ -homoleucine-enkephalin and Dmt-Tic-Gly-NH-Ph, have at best 10-fold  $\delta$ OR selectivity over  $\mu$ OR and actually overrecruit  $\beta$ -arrestin 2 at  $\mu$ OR,<sup>26,29</sup> which would likely cause undesired *in vivo* adverse effects.

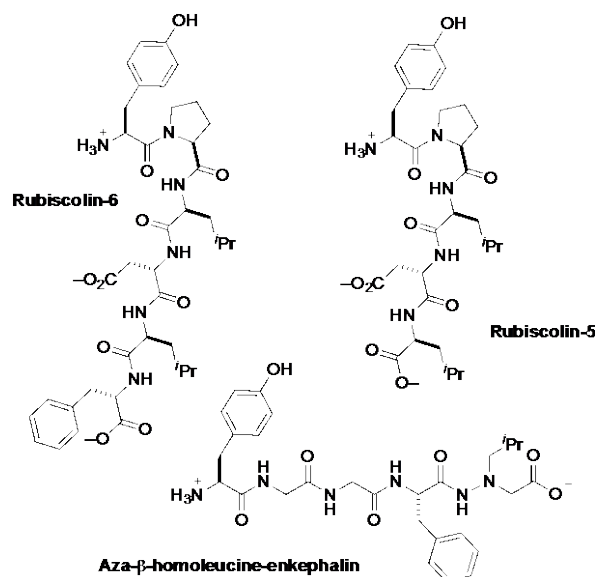

**Figure 1. Aza-β-Homoleucine-Enkephalin, Rubiscolin-5 and -6 are δOR Biased Agonists with Low Affinity, Potency and/or Selectivity.**

A collection of structure activity relationship studies on Leu-enkephalin have been conducted, and multiple studies point to Phe<sup>4</sup> as a position that can modulate δOR and μOR potency and selectivity (Figure 2A).<sup>31</sup> Specifically, ortho and para substitutions on Phe<sup>4</sup> can modulate binding affinity and selectivity between opioid receptors.<sup>31</sup> Particularly, halogenation of the para position of Leu-enkephalin and endomorphin 1 increased δOR affinity while reducing μOR affinity.<sup>31</sup> Similarly, halogenation of the para position of Phe<sup>4</sup> of [D-Pen<sup>2</sup>,D-Pen<sup>5</sup>]enkephalin (DPDPE) improved δOR selectivity, potency, peptide stability, central nervous system (CNS) distribution, and improved antinociceptive potency compared to DPDPE.<sup>32–34</sup> Additionally, a para-chlorinated analogue of a biphalin (Tyr-D-Ala-Gly-Phe-NH)<sub>2</sub> also exhibited improved CNS permeability through both the blood-brain and blood-cerebrospinal fluid barriers.<sup>35</sup> Despite these previous studies at Phe<sup>4</sup>, structure-activity- and structure-property relationships at the meta-position of Phe<sup>4</sup> have surprisingly not been previously reported. To

address this gap, we herein report structure-activity-relationship trends at the meta-position of Phe<sup>4</sup> of Leu-enkephalin (**Figure 2B**), and demonstrate that this position not only regulates  $\delta$ OR and  $\mu$ OR affinity and functional activity (G protein-mediated pathway), and enables tuning of  $\beta$ -arrestin 2 (arrestin 3) recruitment for both  $\delta$ OR and  $\mu$ OR, but also increases plasma stability of the peptides. Combined, these features provide clear direction for designing next-generation analogs of Leu-enkephalin with well-defined biases and improved stabilities.

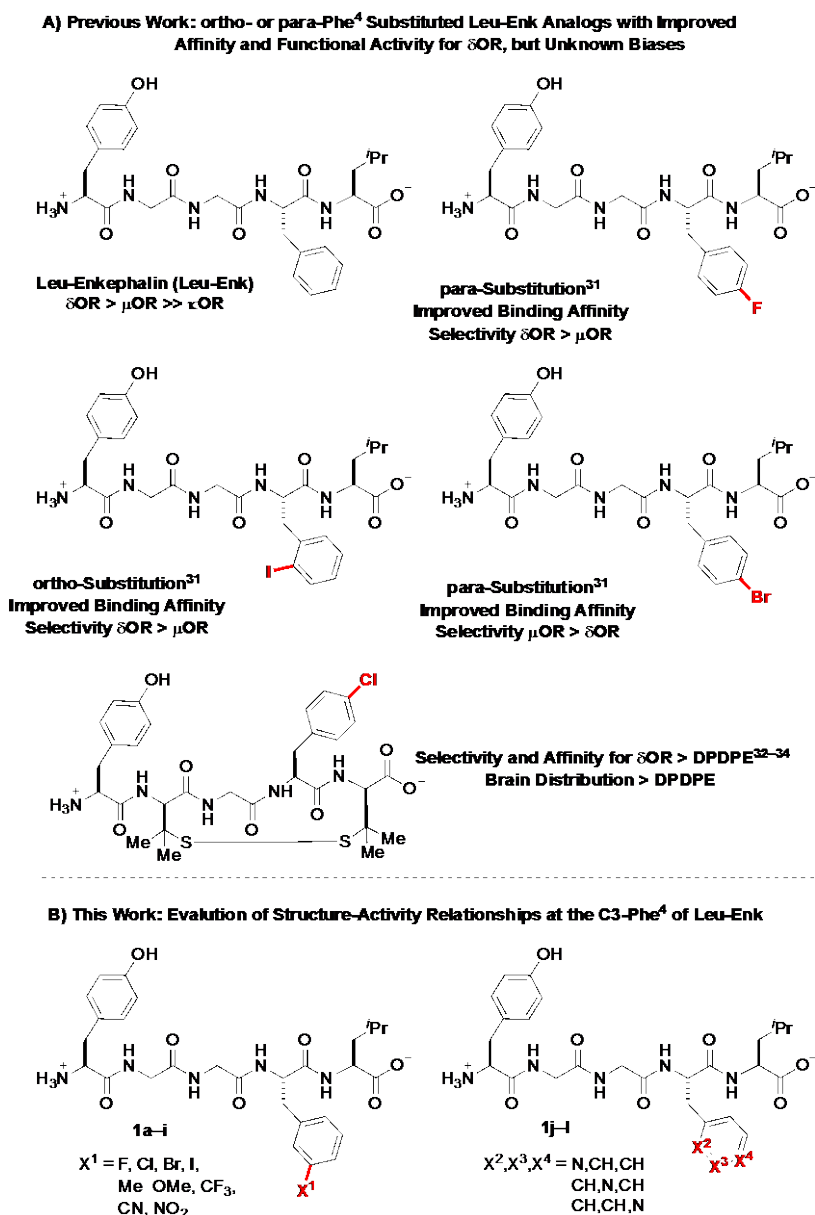

**Figure 2. Substituents of Phe<sup>4</sup> of Leu-enkephalin Affect Pharmacodynamic, Stability, and Distribution Properties.**

## Results and Discussion

*Design Considerations:* To probe the meta position of Phe<sup>4</sup>, we initially considered known structure-activity-relationship trends at the ortho and para positions of this residue. Considering that halogenated substituents at these positions perturbed binding affinity,  $\delta$ OR selectivity, and

stability properties of the Leu-enkephalin,<sup>31</sup> we initially targeted meta-halogenated analogs (**Figure 3A, 1a–1d**). An additional set of analogs bearing electron-donating (**1e–1f**) and -withdrawing groups (**1g–1i**) would further probe interactions at this site, including the electronic character of the Phe<sup>4</sup> ring. Finally, pyridine analogs (**1j–1l**) would present H-bond accepting contacts about the ring, as well as provide analogs that present dipoles at similar vectors as to previously successful halogenated substituents.

*Solid Phase Synthesis of Peptides:* All peptides were synthesized using a rapid solid phase peptide synthesis protocol on an automated peptide synthesizer using an Fmoc protection strategy<sup>36,37</sup> and *N,N'*-diisopropylcarbodiimide and oxyma as the coupling reagents (**Figure 3B**). Fmoc-Leu-Wang resin was utilized as a starting template for this synthetic protocol. All coupling steps and Fmoc-deprotection steps were carried out at 70 °C under an atmosphere of N<sub>2</sub>. Cleavage from the resin was performed using TFA/triisopropylsilane/H<sub>2</sub>O. Purification of the synthesized peptides was performed by reverse-phase high performance liquid chromatography (RP-HPLC), and analysis of purity was performed using an ultra-performance liquid chromatography (UPLC). All desired peptides were obtained in ≥95% purity before submitting for pharmacological evaluation.



**A) Leu-Enk Analogs Prepared**

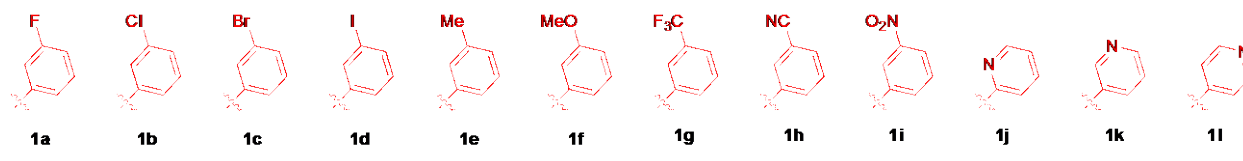

**B) Synthetic Route to Phe<sup>4</sup>-Substituted Leu-Enk Analogues**

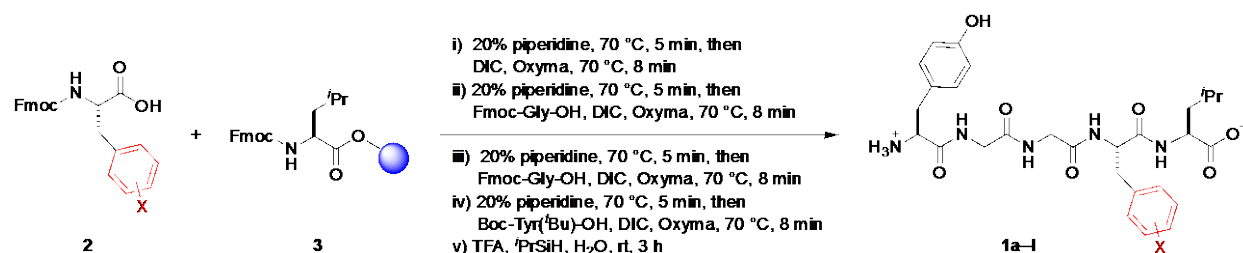

**Figure 3. Peptide Synthesis of Phe<sup>4</sup>-Substituted Analogs of Leu-enkephalin.**

*Pharmacological Characterization:* To characterize our substituted analogs, we assessed binding affinity by competition radioligand binding, G protein potency and efficacy using a cAMP GloSensor assay and  $\beta$ -arrestin 2 recruitment via PathHunter assays at both  $\delta$ OR and  $\mu$ OR. Using Leu-enkephalin as well as DAMGO (for  $\mu$ OR) as reference compounds, substitution of the meta position of Phe<sup>4</sup> (**1a–1i**) generally increased binding affinity for the  $\delta$ OR (**Table 1**,  $K_i$  = 0.03–0.68 nM; Leu-enkephalin = 0.9 nM) and  $\mu$ OR ( $K_i$  = 0.08–1.71 nM; Leu-enkephalin = 1.9 nM). The improved binding affinity correlated with improved functional activation of the G protein pathway at both the  $\delta$ OR and  $\mu$ OR, while providing near-full agonist activity at the  $\delta$ OR (**Table S1**, 92–100% efficacy) relative to Leu-enkephalin, and mostly near-full agonist activities at the  $\mu$ OR (**Table S1**, 85–105% efficacy; Leu-enkephalin = 100% efficacy vs. DAMGO).

**Table 1. Meta Substituted Phe<sup>4</sup> Analogs of Leu-enkephalin Increase Affinity at  $\delta$ OR and  $\mu$ OR**

|                              | <b><math>K_i</math> <math>\delta</math>OR<br/>(nM <math>\pm</math> SD)</b> | <b><math>K_i</math> <math>\mu</math>OR<br/>(nM <math>\pm</math> SD)</b> | <b>Binding Selectivity<br/>(<math>\delta</math>OR vs <math>\mu</math>OR)</b> |
|------------------------------|----------------------------------------------------------------------------|-------------------------------------------------------------------------|------------------------------------------------------------------------------|
| <b>1a</b> (F)                | 0.36 $\pm$ 0.15                                                            | 1.71 $\pm$ 2.3                                                          | 4.8                                                                          |
| <b>1b</b> (Cl)               | 0.15 $\pm$ 0.09                                                            | 0.10 $\pm$ 0.08                                                         | 0.6                                                                          |
| <b>1c</b> (Br)               | 0.05 $\pm$ 0.04                                                            | 0.22 $\pm$ 0.26                                                         | 4.2                                                                          |
| <b>1d</b> (I)                | 0.03 $\pm$ 0.03                                                            | 0.41 $\pm$ 0.6                                                          | 13.4                                                                         |
| <b>1e</b> (Me)               | 0.15 $\pm$ 0.06                                                            | 0.15 $\pm$ 0.07                                                         | 1.0                                                                          |
| <b>1f</b> (OMe)              | 0.51 $\pm$ 0.15                                                            | 0.87 $\pm$ 0.19                                                         | 1.7                                                                          |
| <b>1g</b> (CF <sub>3</sub> ) | 0.12 $\pm$ 0.0.1                                                           | 0.08 $\pm$ 0.07                                                         | 0.7                                                                          |
| <b>1h</b> (CN)               | 0.59 $\pm$ 0.32                                                            | 0.32 $\pm$ 0.15                                                         | 0.5                                                                          |
| <b>1i</b> (NO <sub>2</sub> ) | 0.68 $\pm$ 0.23                                                            | 1.03 $\pm$ 0.35                                                         | 1.5                                                                          |
| <b>1j</b> (2-pyr)            | 6.34 $\pm$ 2.0                                                             | 10.67 $\pm$ 6.9                                                         | 1.7                                                                          |
| <b>1k</b> (3-pyr)            | 33.6 $\pm$ 6.1                                                             | 164 $\pm$ 55                                                            | 4.9                                                                          |
| <b>1l</b> (4-pyr)            | 20.4 $\pm$ 1.1                                                             | 41.13 $\pm$ 17                                                          | 2.0                                                                          |
| Leu-enkephalin               | 0.9 $\pm$ 0.3                                                              | 1.9 $\pm$ 0.4                                                           | 2.1                                                                          |
| DAMGO                        | -                                                                          | 1.7 $\pm$ 0.3                                                           | -                                                                            |

All compounds were tested in three independent trials.

At the  $\delta$ OR, meta-substituted analogs recruited  $\beta$ -arrestin 2 with a range of potencies (**Table 2**, EC<sub>50</sub>: 0.24–114 nM; Leu-enkephalin = 8 nM) with near-full efficacies (**Table 2**, 90–130%; Leu-enkephalin = 100%), and likewise at the  $\mu$ OR, analogs recruited  $\beta$ -arrestin 2 with a broad range of potencies (**Table 2**, pEC<sub>50</sub>: 58–568 nM; Leu-enkephalin = 1214 nM) and efficacies (**Table 2**, 60–96% relative to DAMGO; Leu-enkephalin = 60%; **Figure 4**). Picoline analogs **1j–l**, generally showed reduced affinity at both receptors (**Table 1**,  $\delta$ OR  $K_i$  = 6.3–34 nM;  $\mu$ OR  $K_i$  = 11–164 nM), which further correlated with decreased G protein activation of the receptors (**Table 2**,  $\delta$ OR IC<sub>50</sub> = 6.1–60 nM;  $\mu$ OR pIC<sub>50</sub> = 120–902 nM). At the  $\delta$ OR, the low affinity of pyridyl-substituted analogs correlated with low  $\beta$ -arrestin 2 recruitment (**Table 2**, EC<sub>50</sub> = 137–1186 nM; 84–98% efficacy), though these substitutions drastically affected  $\beta$ -arrestin 2 recruitment though the  $\mu$ OR (**Table 2**, EC<sub>50</sub> = 1.4–44  $\mu$ M; 36–70% efficacy).

**Table 2. Meta-substituted Phe<sup>4</sup> Analogs of Leu-enkephalin Display Enhanced  $\delta$ OR and  $\mu$ OR Potency for cAMP Inhibition and  $\beta$ -arrestin 2 Recruitment, But Vary in  $\beta$ -arrestin Recruitment Efficacy.**

| Compound                     | cAMP                                          |                                      | $\beta$ -arrestin 2                     |                                   |                                         |                                |
|------------------------------|-----------------------------------------------|--------------------------------------|-----------------------------------------|-----------------------------------|-----------------------------------------|--------------------------------|
|                              | $\delta$ OR IC <sub>50</sub><br>(nM $\pm$ SD) | $\mu$ OR IC <sub>50</sub><br>(nM+SD) | $\delta$ OR EC <sub>50</sub><br>(nM+SD) | $\delta$ OR<br>Efficacy<br>(%+SD) | $\mu$ OR<br>EC <sub>50</sub><br>(nM+SD) | $\mu$ OR<br>Efficacy<br>(%+SD) |
| <b>1a</b> (F)                | 0.43<br>$\pm$ 0.26                            | 13.3<br>$\pm$ 16                     | 30.0<br>$\pm$ 48                        | 107<br>$\pm$ 23                   | 476<br>$\pm$ 379                        | 75<br>$\pm$ 22                 |
| <b>1b</b> (Cl)               | 0.037<br>$\pm$ 0.028                          | 33.7<br>$\pm$ 19                     | 1.64<br>$\pm$ 1.4                       | 130<br>$\pm$ 25                   | 60<br>$\pm$ 47                          | 96<br>$\pm$ 14                 |
| <b>1c</b> (Br)               | 0.061<br>$\pm$ 0.061                          | 33.4<br>$\pm$ 53                     | 0.24<br>$\pm$ 0.1                       | 116<br>$\pm$ 19                   | 205<br>$\pm$ 323                        | 79<br>$\pm$ 11                 |
| <b>1d</b> (I)                | 0.029<br>$\pm$ 0.016                          | 6.2<br>$\pm$ 4.6                     | 1.27<br>$\pm$ 1.6                       | 111<br>$\pm$ 16                   | 58<br>$\pm$ 49                          | 70<br>$\pm$ 6                  |
| <b>1e</b> (Me)               | 0.083<br>$\pm$ 0.095                          | 6.9<br>$\pm$ 6.1                     | 3.18<br>$\pm$ 0.9                       | 105<br>$\pm$ 13                   | 208<br>$\pm$ 106                        | 71<br>$\pm$ 7                  |
| <b>1f</b> (OMe)              | 0.29<br>$\pm$ 0.32                            | 18.4<br>$\pm$ 21                     | 9.78<br>$\pm$ 13                        | 106<br>$\pm$ 16                   | 610<br>$\pm$ 208                        | 67<br>$\pm$ 5                  |
| <b>1g</b> (CF <sub>3</sub> ) | 0.39<br>$\pm$ 0.44                            | 13.9<br>$\pm$ 21                     | 4.00<br>$\pm$ 1.1                       | 108<br>$\pm$ 21                   | 79<br>$\pm$ 55                          | 71<br>$\pm$ 5                  |
| <b>1h</b> (CN)               | 1.73 $\pm$<br>3.56                            | 30.1<br>$\pm$ 48                     | 30.8<br>$\pm$ 35                        | 91<br>$\pm$ 13                    | 273<br>$\pm$ 187                        | 68<br>$\pm$ 8                  |
| <b>1i</b> (NO <sub>2</sub> ) | 0.75<br>$\pm$ 0.57                            | 382<br>$\pm$ 808                     | 114<br>$\pm$ 184                        | 96<br>$\pm$ 11                    | 568<br>$\pm$ 210                        | 60<br>$\pm$ 13                 |
| <b>1j</b> (2-pyr)            | 6.1<br>$\pm$ 4.7                              | 120<br>$\pm$ 157                     | 137<br>$\pm$ 110                        | 92<br>$\pm$ 28                    | 1418<br>$\pm$ 594                       | 70<br>$\pm$ 7                  |
| <b>1k</b> (3-pyr)            | 60.0<br>$\pm$ 42                              | 902<br>$\pm$ 1136                    | 1186 $\pm$<br>452                       | 85<br>$\pm$ 11                    | 43952<br>$\pm$ 14683                    | 36<br>$\pm$ 11                 |
| <b>1l</b> (4-pyr)            | 41.6<br>$\pm$ 31                              | 877<br>$\pm$ 1272                    | 512<br>$\pm$ 374                        | 98<br>$\pm$ 12                    | 38812<br>$\pm$ 14217                    | 64<br>$\pm$ 18                 |
| Leu-enkephalin               | 0.49<br>$\pm$ 0.38                            | 108<br>$\pm$ 141                     | 7.98<br>$\pm$ 4.3                       | 100                               | 1214<br>$\pm$ 782                       | 60<br>$\pm$ 7                  |
| DAMGO                        | 1717 $\pm$<br>1379                            | 28.4 $\pm$ 35                        | >10,000                                 | -                                 | 194<br>$\pm$ 71                         | 100                            |

Within these overall trends, specific analogs show unique profiles (**Figure 4**). Meta-chlorination, -bromination, or -iodination (**1b–d**) produced analogs of Leu-enkephalin that super-

recruited  $\beta$ -arrestin 2 and that drastically increased functional selectivity (**Table 3**). These increases in affinity at  $\delta$ OR might derive from halogen bonding interactions that have been previously explored at the ortho and para positions of Phe<sup>4</sup> that improve affinity up to 6-fold.<sup>31</sup> Though the improved  $\delta$ OR affinity at the meta position is significantly greater than the perturbations imparted by Cl, Br, or I at the ortho position (up to 6- to 17-fold, based on  $\delta$ OR construct).<sup>31</sup> Notably, the meta-chlorinated and -brominated analogs (**1b**, and **1c**) are 500-900-fold more potent in cAMP assays at  $\delta$ OR than at  $\mu$ OR, despite exhibiting little differences in binding affinity at  $\delta$ OR relative to  $\mu$ OR (**Table 1**). Interestingly, the meta-Cl analog (**1b**) had stronger bias towards G protein-signaling at  $\delta$ OR (**Table 3**, bias factor 1.6), but towards  $\beta$ -arrestin 2 recruitment at  $\mu$ OR relative to Leu-enkephalin (**Table 3**, bias factor 0.004) as well as DAMGO (**Table 3**, bias factor 0.3), which provides a unique pharmacological profile for future uses. In contrast, meta-F and -CN and -NO<sub>2</sub>-substitutions (**1a,h**) improved  $\delta$ OR functional selectivity (**Table 3**), but lost  $\beta$ -arrestin 2 potency at  $\delta$ OR relative to Leu-enkephalin. Additionally, meta-OMe and -NO<sub>2</sub> substitution (**1f**, **1i**) provided both potent and biased analogs, with G protein coupling activities comparable to Leu-enkephalin (**Table 2**, IC<sub>50</sub> = 0.29–0.75 nM vs. 0.49 nM), but with improved bias factors relative to Leu-enkephalin at both  $\delta$ OR (**Table 3**, bias factor 3.4–3.7) and  $\mu$ OR (**Table 3**, bias factor 8.4–11.1). Of these two analogs, the -NO<sub>2</sub>-substituted analog **1i** exhibited higher  $\delta$ OR functional G protein selectivity (**Table 3**, 512-fold  $\delta$ OR selectivity) relative to the -OMe analog **1f** (**Table 3**, 64-fold  $\delta$ OR selectivity). Though pyridyl-substituted analogs (**1j–l**) showed poor potency and efficacy for the  $\delta$ OR and  $\mu$ OR relative to Leu-enkephalin (**Table 2**), the 3- and 4-pyridyl analogs (**1k–l**) showed strong bias at  $\mu$ OR (**Table 3**, bias factor 17–331), when compared to the full agonist DAMGO. However, if instead, Leu-enkephalin was used as the reference compound, most analogs lost G protein bias

(Table 3, bias factor 0.004–0.27), because the analogs generally were more potent and efficacious than Leu-enkephalin in recruiting  $\beta$ -arrestin 2 at  $\mu$ OR (Table 2), with the exception of **1k** (Table 2, 36% recruitment efficacy). Given that exogenous Leu-enkephalin analogs *in vivo* would compete with endogenous Leu-enkephalin and not DAMGO, our results highlight the limitations of interpreting bias factors (particularly using an unnatural compound, such as DAMGO, as a reference) and the associated risk of using bias factor as a major driver of lead optimization.

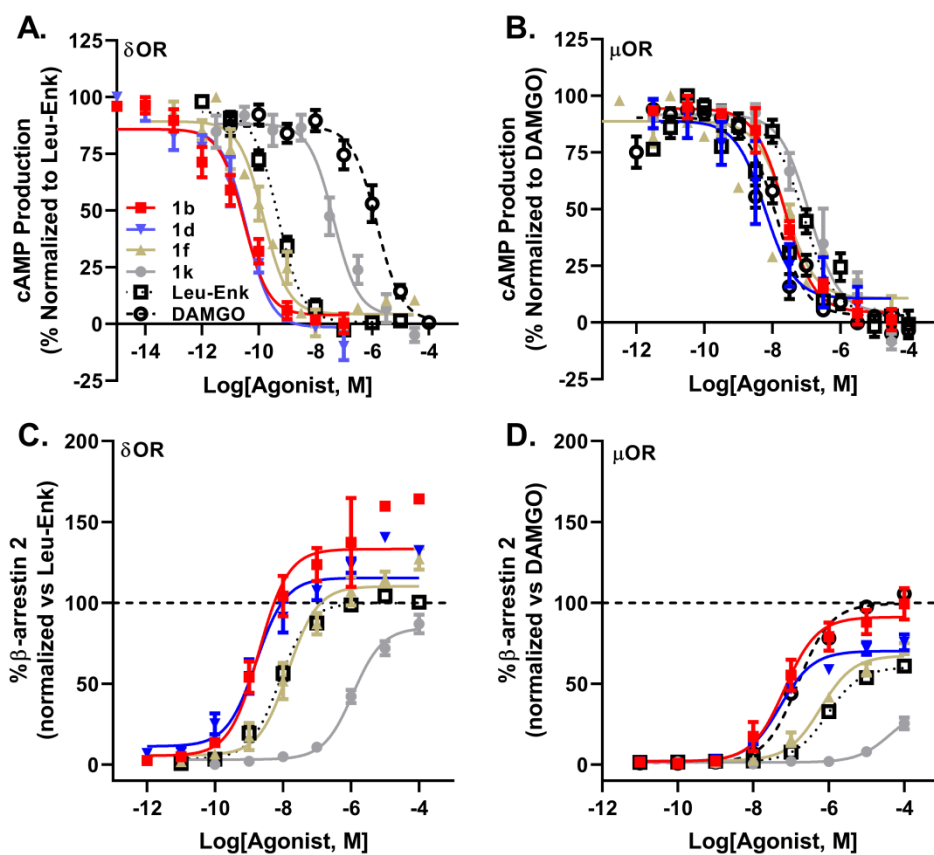

**Figure 4: Modifications of Phe<sup>4</sup> of Leu-enkephalin Produces Analogs with Divergent and Distinct Signaling Profiles.** Inhibition of cAMP production by **1b** (■), **1d** (▼), **1f** (▲), **1k** (●), Leu-enkephalin (Leu-Enk, ■) and DAMGO (○) in HEK cells expressing  $\delta$ OR (A) and  $\mu$ OR

(B). Recruitment of  $\beta$ -arrestin 2 by **1b**, **1d**, **1f**, **1k**, Leu-Enk and DAMGO in CHO cells expressing  $\delta$ OR (C) and  $\mu$ OR (D).

**Table 3. Meta-substituted Phe<sup>4</sup> Analogs of Leu-enkephalin Display a Range of Selectivity and Bias Profiles.**

| Compound                               | G protein Selectivity ( $\delta$ OR vs $\mu$ OR) | Bias factor       |                     |                     |
|----------------------------------------|--------------------------------------------------|-------------------|---------------------|---------------------|
|                                        |                                                  | $\delta$ OR       | $\mu$ OR (DG = ref) | $\mu$ OR (LE = ref) |
| <b>1a</b> (F)                          | 31                                               | 0.9               | 22.2                | 0.36                |
| <b>1b</b> (Cl)                         | 908                                              | 1.6               | 0.3                 | 0.004               |
| <b>1c</b> (Br)                         | 545                                              | 0.6               | 1.2                 | 0.02                |
| <b>1d</b> (I)                          | 210                                              | 1.7               | 3.2                 | 0.05                |
| <b>1e</b> (Me)                         | 82                                               | 2.1               | 11.5                | 0.19                |
| <b>1f</b> (OMe)                        | 64                                               | 3.7               | 8.4                 | 0.14                |
| <b>1g</b> (CF <sub>3</sub> )           | 13                                               | 1.0               | 4.3                 | 0.07                |
| <b>1h</b> (CN)                         | 17                                               | 3.3               | 5.4                 | 0.09                |
| <b>1i</b> (NO <sub>2</sub> )           | 512                                              | 3.4               | 11.1                | 0.18                |
| <b>1j</b> (2-pyr)                      | 20                                               | 1.9               | 17.2                | 0.27                |
| <b>1k</b> (3-pyr)                      | 15                                               | 3.3               | 331.1               | 5.89                |
| <b>1l</b> (4-pyr)                      | 21                                               | 1.1               | 63.7                | 1.08                |
| Leu-enkephalin                         | 162                                              | 1                 | 4.9                 | 1                   |
| DAMGO                                  | 0.017                                            | -                 | 1                   | 0.003               |
| Aza- $\beta$ -homoleucine <sup>¶</sup> | 9.9 <sup>26</sup>                                | 5.2 <sup>¶</sup>  | -                   | 1.2                 |
| Rubiscolin-5                           | -                                                | 2.0 <sup>28</sup> | -                   | -                   |

<sup>¶</sup>from reference 26 using BRET ( $\beta$ -arrestin 2) and EPAC (cAMP) assays. DG = DAMGO, LE =

Leu-enkephalin

*Stability:* The stability of all compounds to Sprague Dawley rat plasma was assessed to study the influence of the meta- and picoline/pyridine-substitutions at Phe<sup>4</sup> relative to Leu-enkephalin. For this parent compound, the predominant known routes of metabolism and clearance occur through cleavage of Tyr<sup>1</sup>-Gly<sup>2</sup> by aminopeptidase N,<sup>38,39</sup> and of Gly<sup>3</sup>-Phe<sup>4</sup> by angiotensin

converting enzyme,<sup>40</sup> and combined, the plasma metabolism occurs with a half-life ( $t_{1/2}$ ) of < 10 min. In general, meta substituted Phe<sup>4</sup> analogues exhibited improved plasma stability compared with Leu-enkephalin with half-lives typically >20 min. The 3-Fluoro derivative (**1a**) was the most stable analog with a half-life of 82.3 min (**Table 4**). From UPLC-mass spectrometry analysis of degradation fragments, meta-substitution did not greatly impede the proteolysis at the Tyr<sup>1</sup>-Gly<sup>2</sup> site, but instead slowed digestion at the Gly<sup>3</sup>-Phe<sup>4</sup> site (See SI for more details). Thus, the improved stability of our Phe<sup>4</sup>-substituted analogs presumably derived from perturbation/deceleration of angiotensin-converting enzyme activity. Picoline peptides also displayed improved stability though interestingly, UPLC-mass spectrometry analysis indicated that degradation of all pyridyl-substituted analogs (**1j–l**) predominantly occurred through Tyr<sup>1</sup>-Gly<sup>2</sup> as opposed to meta-substituted analogs **1a–i** that degraded through cleavage of Gly<sup>3</sup>-Phe<sup>4</sup>.

**Table 4. Rat Plasma Stability of Leu-enkephalin and Its Analogues**

| Compound                     | Half-life (min) |
|------------------------------|-----------------|
| Leu-enkephalin               | 9.4             |
| <b>1a</b> (F)                | 82.3            |
| <b>1b</b> (Cl)               | 37.8            |
| <b>1c</b> (Br)               | 21.5            |
| <b>1d</b> (I)                | 13.2            |
| <b>1e</b> (Me)               | 39.5            |
| <b>1f</b> (OMe)              | 46.1            |
| <b>1g</b> (CF <sub>3</sub> ) | 44.5            |
| <b>1h</b> (CN)               | 33.0            |
| <b>1i</b> (NO <sub>2</sub> ) | 28.8            |
| <b>1j</b> (2-pyr)            | 26.8            |
| <b>1k</b> (3-pyr)            | 54.0            |
| <b>1l</b> (4-pyr)            | 78.1            |

*Conclusion:* Meta-substitutions of Phe<sup>4</sup> of Leu-enkephalin were generally well tolerated and certain substitutions improved affinity, potency,  $\delta$ OR selectivity and stability of this endogenous opioid. The generated pharmacological data herein may aid computational modeling efforts to reveal ligand-receptor interactions at  $\delta$ OR and  $\mu$ OR that will guide the development of novel peptides with tuned selectivity and signaling profiles.

## Methods

**Synthetic Chemistry – General Considerations.** Unless specified, all chemicals were purchased from commercial sources and used without further purification. All solvents used for synthesis were of analytical grade and used without further purification. Proton nuclear magnetic resonance (<sup>1</sup>H NMR) spectra, and carbon nuclear magnetic resonance (<sup>13</sup>C NMR) spectra were recorded on a Bruker AVIII 500 AVANCE spectrometer with a CPDUL cryoprobe (500 and 126 MHz, respectively) or a Bruker DRX 500 spectrometer (500 and 126 MHz, respectively). Fluorine nuclear magnetic resonance (<sup>19</sup>F NMR) spectra were recorded on a Bruker AVIII 500 AVANCE spectrometer with a CPDUL BBFO cryoprobe (376 MHz) or a Bruker DRX 500 spectrometer (376 MHz). Chemical shifts ( $\delta$ ) for protons are reported in parts per million (ppm) downfield from tetramethylsilane, and are referenced to proton resonance of solvent residual peak in the NMR solvent (MeOD-d<sub>4</sub>:  $\delta$  = 4.87 ppm or DMSO-d<sub>6</sub>:  $\delta$  = 2.50 ppm). Chemical shifts ( $\delta$ ) for carbon are reported in ppm downfield from tetramethylsilane, and are referenced to the carbon resonances of the solvent residual peak (MeOD-d<sub>4</sub>:  $\delta$  = 49.1 ppm or DMSO-d<sub>6</sub>:  $\delta$  = 39.52 ppm). <sup>19</sup>F NMR chemical shifts ( $\delta$ ) are reported in ppm with respect to added internal standard: PhCF<sub>3</sub> ( $\delta$  = -63.72 ppm). NMR data are represented as follows: chemical shift (ppm), multiplicity (s = singlet, d = doublet, dd = doublet of doublets, t = triplet, q = quartet, sept =



septet, m = multiplet), coupling constant in Hertz (Hz), and integration. Exact mass determinations were obtained by using electrospray ionization using a time of flight mass analyzer (Waters LCT Premiere).

Peptides were synthesized using an Aapptec Focus XC automated peptide synthesizer coupled with a heating system using a solid phase peptide synthesis protocol using Fmoc chemistry. Preparative RP-HPLC was performed using an appropriate column and solvent system (described below) and final purity of peptides was determined by UV area % from UPLC analysis. Peptides were purified by Teledyne ISCO EZ Prep system on RediSep® C18 Prep column (30x250 mm, 100 Å). Purity analysis of final peptides was carried out using a Waters UPLC Acquity system equipped with a PDA eλ detector (200 to 400 nm) and a HSS T3 C18 column, (1.8 μM, 2.1x50 mm column), using one of two methods. Protocol A: gradient elution of 2% MeCN with 0.1% formic acid in H<sub>2</sub>O to 98% MeCN over 2.5 min, then holding at 98% MeCN for 3 min at a flow rate of 0.8 mL/min. Protocol B: gradient elution of 2% MeCN with 0.1% formic acid in H<sub>2</sub>O to 98% MeCN over 2.5 min, then holding at 98% MeCN for 1 min at a flow rate of 0.7 mL/min. Plasma stability was also assessed using the above UPLC column and solvent gradient program using a Waters H class Plus Acquity UPLC system coupled with a QDa detector using protocol B.

**Synthesis of Peptides.** Peptides were synthesized using a solid phase peptide synthesis protocol using an Aapptec Focus XC automated peptide synthesizer coupled with a heating system using the Fmoc chemistry and Wang resin as solid support.<sup>36</sup> To prepare the resin for synthesis, a reaction vessel equipped with a sintered glass bottom was charged with Fmoc-Leu-Wang resin (0.2 mM), and swelled in a mixture of dichloromethane and DMF (1:1) for 15 min. The resin was then transferred to a peptide synthesizer reaction vessel. The resin was deprotected twice

using 20% piperidine in DMF for 5 min at 70 °C. Subsequently, an Fmoc-protected amino acid was double coupled with the Leucine-wang resin by treating with *N,N'*-diisopropylcarbodiimide (3.0 equiv., 0.2 M in DMF) and Oxyma (3.0 equiv., 0.2 M in DMF) at 70 °C for 8 min. Completion of coupling reactions was monitored by a Kaiser's test for the initial peptide.<sup>41</sup> Each coupling was followed by removal of the Fmoc group using 20% piperidine in DMF at 70 °C for 5 min and repeated once. The cycle of the Fmoc removal and coupling was repeated with subsequent Fmoc-protected amino acids to generate the desired resin-bound peptide. Cleavage of the peptide from resin and concomitant deprotection of the side chain protecting groups was carried out by shaking in TFA/triisopropylsilane/H<sub>2</sub>O (95/2.5/2.5; 5 mL), at ambient temperature for 3 h. Subsequent filtration afforded the peptide in the filtrate and the volume was reduced to 0.2 mL. Then, the crude peptides were precipitated by adding cold diethyl ether, and the crude peptides were then purified by RP-HPLC. Synthesized peptides were characterized by NMR, and the high-resolution mass spectroscopy.

**Materials Used in the Cellular Signaling Assays.** Leu-enkephalin and forskolin, were purchased from Sigma-Aldrich (St. Louis, MO USA). [D-Ala<sup>2</sup>, N-MePhe<sup>4</sup>, Gly-ol] enkephalin (DAMGO) was purchased from Tocris Bioscience (Minneapolis, MN, USA). Radiolabels were from Perkin Elmer (Waltham, MA, USA)

**Cell culture and biased signaling assays.** cAMP inhibition and  $\beta$ -arrestin 2 recruitment assays were performed as previously described.<sup>18</sup> In brief, for cAMP inhibition assays HEK 293 (Life Technologies, Grand Island, NY, USA) cells were transiently transfected in a 1:3 ratio with FLAG-mouse  $\delta$ OR, or HA-mouse  $\mu$ OR and pGloSensor22F-cAMP plasmids (Promega, Madison, WI, USA) using Xtremegene9 (Sigma). Two days post-transfection cells (20,000 cells/well, 7.5  $\mu$ l) were seeded in low volume Greiner 384-well plates (#82051-458, VWR,

Batavia, IL, USA) and were incubated with Glosensor reagent (Promega, 7.5  $\mu$ l, 2% final concentration) for 90 min at room temperature. Cells were stimulated with 5  $\mu$ l drug solution for 20 min at room temperature prior to stimulation with 5  $\mu$ l forskolin (final concentration 30  $\mu$ M) for an additional 15 min at room temperature. For  $\beta$ -arrestin recruitment assays, CHO-human  $\mu$ OR PathHunter  $\beta$ -arrestin 2 cells or CHO-human  $\delta$ OR PathHunter  $\beta$ -arrestin 2 cells (DiscoverX, Fremont, CA, USA) were plated (2,500 cells/well, 10  $\mu$ l) one day prior to stimulation with 2.5  $\mu$ l drug solution for 90 min at 37 °C/5% CO<sub>2</sub>, after which cells were incubated with 6  $\mu$ l cell PathHunter assay buffer (DiscoverX) for 60 min at room temperature as per the manufacturer's protocol. Luminescence for each of these assays was measured using a FlexStation3 plate reader (Molecular Devices, Sunnyvale, CA, USA).

**Radioligand Binding Assay.** For the binding assay 50  $\mu$ l of a dilution series of peptide was added to 50  $\mu$ l of 3.3 nM [<sup>3</sup>H]DPDPE ( $K_d$  = 3.87 nM) or 2.35 nM of [<sup>3</sup>H]DAMGO ( $K_d$  = 1.07 nM) in a clear 96 well plate. Next, 100  $\mu$ l of membrane suspension containing 7  $\mu$ g protein was added to the agonist wells and incubated for 90 min at room temperature. The reaction mixture was then filtered over a GF-B filter plate (Perkin Elmer) followed by 4 quick washes with ice-cold 50 mM Tris HCl. The plate was dried overnight, after which 50  $\mu$ l scintillation fluid (Ultimagold uLLT) was added and radioactivity was counted on a Packard TopCount NXT scintillation counter. All working solutions were prepared in a radioligand assay buffer containing 50 mM Tris HCl, 10 mM MgCl<sub>2</sub>, and 1 mM ethylenediaminetetraacetic acid at pH 7.4.

**Calculation of Bias Factor.** Bias factors were calculated using the operational model equation in Prism 8 to calculate Log R ( $\tau$ /KA) (**Table S2**) as previously described.<sup>18</sup> Subsequently, bias factors were calculated using Leu-enkephalin as reference compound for  $\delta$ OR and using either

DAMGO or Leu-enkephalin as reference compound for- $\mu$ OR, respectively. Leu-enkephalin and DAMGO were more potent in the cAMP (G protein) assay than in the  $\beta$ -Arr 2 recruitment assay, and thus were not unbiased, but rather G protein-biased to begin with. A bias factor  $>1$  meant that the agonist was more G protein-biased than the reference compound; A bias factor  $<1$  meant that the agonist was less G protein-biased than the reference compound.

**Data and Statistical analysis.** All data are presented as means  $\pm$  standard error of the mean, and analysis was performed using GraphPad Prism 8 software (GraphPad Software, La Jolla, CA). For *in vitro* assays, nonlinear regression was conducted to determine  $pIC_{50}$  (cAMP) or  $pEC_{50}$  ( $\beta$ -arrestin 2 recruitment). Technical replicates were used to ensure the reliability of single values, specifically each data point for binding and  $\beta$ -arrestin recruitment was run in duplicate, and for the cAMP assay in triplicate. The averages of each independent run were counted as a single experiment and combined to provide a composite curve in favor of providing a ‘representative’ curve. In each experimental run, a positive control/reference compound was utilized to allow the data to be normalized and to calculate the log bias value.

**Assessment of Plasma Stability.** Sprague Dawley rat plasma containing K<sub>2</sub>-ethylenediaminetetraacetic acid (Innovative Research, MI, USA) was transferred into 300  $\mu$ L aliquots and stored at  $-20$  °C until use. The plasma stabilities of Leu-enkephalin and its synthesized analogues were determined in plasma diluted to 50% with saline (isotonic sodium chloride solution; 0.9% w/v).<sup>42</sup> An aliquot of the resulting solution (25  $\mu$ L) was incubated at 37 °C for 15 min before the addition of a solution of a Leu-enkephalin analogue (25  $\mu$ L of a 100  $\mu$ M isotonic NaCl solution; 0.9% w/v). After adding analogue, an aliquot of the mixture was removed at each indicated time point (0, 5, 10, 15, 20, 30, 60, 120, 240 min) and immediately quenched with 100  $\mu$ L of a methanol solution containing 20  $\mu$ M Fmoc-Leu-OH as an internal

standard. The resulting peptide solutions were centrifuged at 13,000 rpm for 15 min at 4 °C on tubes equipped with 2000 MW filtrate tubes (Sartorius, USA). Then, the filtrate was transferred into vials and a 5 µL sample of the resulting solution was analyzed on an UPLC system coupled with a QDa detector. For quantitative determination, area-under-the-curve for the peaks corresponding to the UV chromatogram was measured for both the Leu-enkephalin analogue and the internal standard. Determination of half-life ( $t_{1/2}$ ) was carried out by using the GraphPad Prism one-phase decay method.

## Supporting Information

For compounds **1a–l**: Additional pharmacological characterization, stability data, NMR spectra and characterization data for peptides, UPLC traces for determining purity

## Abbreviations

cAMP, 3',5'-cyclic adenosine monophosphate; CNS, central nervous system; DAMGO, [D-Ala<sup>2</sup>, N-MePhe<sup>4</sup>, Gly-ol]-enkephalin;  $\delta$ OR, Delta opioid receptors; DMF, *N,N*-Dimethylformamide; DPDPE, [D-Pen<sup>2</sup>,D-Pen<sup>5</sup>]-enkephalin; GTP $\gamma$ S, guanosine 5'-*O*-[gamma-thio]triphosphate;  $\mu$ OR, Mu opioid receptors; RP-HPLC, Reverse phase high performance liquid chromatography;  $t_{1/2}$ , half-life; UPLC, Ultra performance liquid chromatography.

## Author Information

### Corresponding Authors

Email: [rvanrijn@purdue.edu](mailto:rvanrijn@purdue.edu)

Email: [raaltman@ku.edu](mailto:raaltman@ku.edu)

## **ORCID**

Richard M. van Rijn: 0000-0002-9957-1633

Ryan A. Altman: 0000-0002-8724-1098

Kendall Mores: 0000-0002-4605-1722

Krishna K. Sharma: 0000-0003-4927-745X

Robert J. Cassell: 0000-0003-4902-3062

## **Authors Contributions**

R.J.C. data acquisition and analysis, supervision and original draft preparation. K.K.S. design, synthesis, and analysis of analogs, original draft preparation. H.S. data acquisition and analysis. B.R.C. data acquisition and analysis. H.C. data acquisition and analysis. K.L.M. data acquisition and analysis. R.A.A. design and conceptualization, data analysis, original draft preparation, funding acquisition and supervision. R.M.vR.: design and conceptualization, data analysis, original draft preparation, funding acquisition and supervision. All authors proofread and approved the final draft.

## **Funding Sources**

R.M.vR. is supported by funds provided by the National Institute on Alcohol Abuse and Alcoholism (AA025368, AA026949, AA026675) and Drug Abuse (DA045897) of the National Institutes of Health, the Purdue Institute for Drug Discovery and the Department of Medicinal Chemistry and Molecular Pharmacology. R.A.A. acknowledges the National Institute on Drug Abuse (DA036730) for support. NMR Instrumentation was provided by NIH Shared Instrumentation Grants (S10OD016360 and S10RR024664), NSF Major Research

Instrumentation Grants (9977422 and 0320648), and an NIH Center Grant (P20GM103418). The content herein is the sole responsibility of the authors and does not necessarily represent the official views of the US National Institutes of Health.

### **Conflict of Interest**

All authors report no other biomedical financial interests or potential conflicts of interests.

### **References**

- (1) Hughes, J.; Smith, T. W.; Kosterlitz, H. W.; Fothergill, L. A.; Morgan, B. A.; Morris, H. R. Identification of Two Related Pentapeptides from the Brain with Potent Opiate Agonist Activity. *Nature* **1975**, *258* (5536), 577–580.
- (2) Comb, M.; Seeburg, P. H.; Adelman, J.; Eiden, L.; Herbert, E. Primary Structure of the Human Met- and Leu-Enkephalin Precursor and Its MRNA. *Nature* **1982**, *295* (5851), 663–666.
- (3) Ikeda, Y.; Nakao, K.; Yoshimasa, T.; Yanaihara, N.; Numa, S.; Imura, H. Existence of Met-Enkephalin-Arg6-Gly7-Leu8 with Met-Enkephalin, Leu-Enkephalin and Met-Enkephalin-Arg6-Phe7 in the Brain of Guinea Pig, Rat and Golden Hamster. *Biochem. Biophys. Res. Commun.* **1982**, *107* (2), 656–662.
- (4) Simantov, R.; Kuhar, M. J.; Pasternak, G. W.; Snyder, S. H. The Regional Distribution of a Morphine-like Factors Enkephalin in Monkey Brain. *Brain Res.* **1976**, *106* (1), 189–197.
- (5) Akil, H.; Owens, C.; Gutstein, H.; Taylor, L.; Curran, E.; Watson, S. Endogenous Opioids: Overview and Current Issues. *Drug Alcohol Depend.* **1998**, *51* (1–2), 127–140.

- (6) Raynor, K.; Kong, H.; Chen, Y.; Yasuda, K.; Yu, L.; Bell, G. I.; Reisine, T.  
Pharmacological Characterization of the Cloned Kappa-, Delta-, and Mu-Opioid Receptors. *Mol. Pharmacol.* **1994**, *45* (2), 330–334.
- (7) Belluzzi, J. D.; Grant, N.; Garsky, V.; Sarantakis, D.; Wise, C. D.; Stein, L. Analgesia Induced in Vivo by Central Administration of Enkephalin in Rat. *Nature* **1976**, *260* (5552), 625–626.
- (8) Schaz, K.; Stock, G.; Simon, W.; Schlor, K. H.; Unger, T.; Rockhold, R.; Ganten, D.  
Enkephalin Effects on Blood Pressure, Heart Rate, and Baroreceptor Reflex. *Hypertens. (Dallas, Tex. 1979)* **1980**, *2* (4), 395–407.
- (9) Remesic, M.; Lee, Y. S.; Hruby, V. J. Cyclic Opioid Peptides. *Curr. Med. Chem.* **2016**, *23* (13), 1288–1303.
- (10) Maldonado, R.; Severini, C.; Matthes, H. W.; Kieffer, B. L.; Melchiorri, P.; Negri, L.  
Activity of Mu- and Delta-Opioid Agonists in Vas Deferens from Mice Deficient in MOR Gene. *Br. J. Pharmacol.* **2001**, *132* (7), 1485–1492.
- (11) Denis, C.; Sauliere, A.; Galandrin, S.; Senard, J.-M.; Gales, C. Probing Heterotrimeric G Protein Activation: Applications to Biased Ligands. *Curr. Pharm. Des.* **2012**, *18* (2), 128–144.
- (12) Oakley, R. H.; Hudson, C. C.; Cruickshank, R. D.; Meyers, D. M.; Payne, R. E. J.; Rhem, S. M.; Loomis, C. R. The Cellular Distribution of Fluorescently Labeled Arrestins Provides a Robust, Sensitive, and Universal Assay for Screening G Protein-Coupled Receptors. *Assay Drug Dev. Technol.* **2002**, *1* (1 Pt 1), 21–30.
- (13) Charest, P. G.; Terrillon, S.; Bouvier, M. Monitoring Agonist-Promoted Conformational Changes of Beta-Arrestin in Living Cells by Intramolecular BRET. *EMBO Rep.* **2005**, *6*



- (4), 334–340.
- (14) van Der Lee, M. M. C.; Bras, M.; van Koppen, C. J.; Zaman, G. J. R. Beta-Arrestin Recruitment Assay for the Identification of Agonists of the Sphingosine 1-Phosphate Receptor EDG1. *J. Biomol. Screen.* **2008**, *13* (10), 986–998.
- (15) Reiter, E.; Ahn, S.; Shukla, A. K.; Lefkowitz, R. J. Molecular Mechanism of Beta-Arrestin-Biased Agonism at Seven-Transmembrane Receptors. *Annu. Rev. Pharmacol. Toxicol.* **2012**, *52*, 179–197.
- (16) Vicente-Sanchez, A.; Dripps, I. J.; Tipton, A. F.; Akbari, H.; Akbari, A.; Jutkiewicz, E. M.; Pradhan, A. A. Tolerance to High-Internalizing Delta Opioid Receptor Agonist Is Critically Mediated by Arrestin 2. *Br. J. Pharmacol.* **2018**, *175* (14), 3050–3059.
- (17) Robins, M. T.; Chiang, T.; Mores, K. L.; Alongkronrusmee, D.; van Rijn, R. M. Critical Role for Gi/o-Protein Activity in the Dorsal Striatum in the Reduction of Voluntary Alcohol Intake in C57Bl/6 Mice. *Front. psychiatry* **2018**, *9*, 112.
- (18) Chiang, T.; Sansuk, K.; Van Rijn, R. M.  $\beta$ -Arrestin 2 Dependence of  $\delta$  Opioid Receptor Agonists Is Correlated with Alcohol Intake. *Br. J. Pharmacol.* **2016**, *173* (2), 332–343.
- (19) Wadman, M. “Biased” Opioids Could Yield Safer Pain Relief. *Science (New York, N.Y.)*. United States November 2017, pp 847–848.
- (20) Peppin, J. F.; Raffa, R. B. Delta Opioid Agonists: A Concise Update on Potential Therapeutic Applications. *J. Clin. Pharm. Ther.* **2015**, *40* (2), 155–166.
- (21) Codd, E. E.; Carson, J. R.; Colburn, R. W.; Stone, D. J.; Van Besien, C. R.; Zhang, S.-P.; Wade, P. R.; Gallantine, E. L.; Meert, T. F.; Molino, L.; Pullan, S.; Razler, C. M.; Dax, S. L.; Flores, C. M. JNJ-20788560 [9-(8-Azabicyclo[3.2.1]Oct-3-Ylidene)-9H-Xanthene-3-Carboxylic Acid Diethylamide], a Selective Delta Opioid Receptor Agonist, Is a Potent

- and Efficacious Antihyperalgesic Agent That Does Not Produce Respiratory Depression, Pharmacologic Tole. *J. Pharmacol. Exp. Ther.* **2009**, 329 (1), 241–251.
- (22) Cheng, P. Y.; Wu, D.; Decena, J.; Soong, Y.; McCabe, S.; Szeto, H. H. Opioid-Induced Stimulation of Fetal Respiratory Activity by [D-Ala<sup>2</sup>]Deltorphin I. *Eur. J. Pharmacol.* **1993**, 230 (1), 85–88.
- (23) Berridge, K. C.; Robinson, T. E.; Aldridge, J. W. Dissecting Components of Reward: “Liking”, “Wanting”, and Learning. *Curr. Opin. Pharmacol.* **2009**, 9 (1), 65–73.
- (24) Roques, B. P.; Fournie-Zaluski, M.-C.; Wurm, M. Inhibiting the Breakdown of Endogenous Opioids and Cannabinoids to Alleviate Pain. *Nat. Rev. Drug Discov.* **2012**, 11 (4), 292–310.
- (25) TRV250: Potential first-in-class molecule for the treatment of acute migraine. <http://www.trevena.com/TRV250.php> (accessed on Sept 25, 2018).
- (26) Bella Ndong, D.; Blais, V.; Holleran, B. J.; Proteau-Gagné, A.; Cantin-Savoie, I.; Robert, W.; Nadon, J.-F.; Beauchemin, S.; Leduc, R.; Piñeyro, G.; Guérin, B.; Gendron, L.; Dory, Y. L. Exploration of the Fifth Position of Leu-Enkephalin and Its Role in Binding and Activating Delta (DOP) and Mu (MOP) Opioid Receptors. *Pept. Sci.* **2018**, e24070.
- (27) Milan-Lobo, L.; Enquist, J.; van Rijn, R. M.; Whistler, J. L. Anti-Analgesic Effect of the Mu/Delta Opioid Receptor Heteromer Revealed by Ligand-Biased Antagonism. *PLoS One* **2013**, 8 (3).
- (28) Cassell, R. J.; Mores, K. L.; Zerfas, B. L.; Mahmoud, A. H.; Lill, M. A.; Trader, D. J.; van Rijn, R. M. Rubiscolins Are Naturally Occurring G Protein-Biased Delta Opioid Receptor Peptides. *Eur. Neuropsychopharmacol.* **2019**, 29 (3), 450–456.
- (29) Vezzi, V.; Onaran, H. O.; Molinari, P.; Guerrini, R.; Balboni, G.; Calo, G.; Costa, T.

- Ligands Raise the Constraint That Limits Constitutive Activation in G Protein-Coupled Opioid Receptors. *J. Biol. Chem.* **2013**, 288 (33), 23964–23978.
- (30) Aguila, B.; Coulbault, L.; Boulouard, M.; Leveille, F.; Davis, A.; Toth, G.; Borsodi, A.; Balboni, G.; Salvadori, S.; Jauzac, P.; Allouche, S. In Vitro and in Vivo Pharmacological Profile of UFP-512, a Novel Selective Delta-Opioid Receptor Agonist; Correlations between Desensitization and Tolerance. *Br. J. Pharmacol.* **2007**, 152 (8), 1312–1324.
- (31) Rosa, M.; Caltabiano, G.; Barreto-Valer, K.; Gonzalez-Nunez, V.; Gómez-Tamayo, J. C.; Ardá, A.; Jiménez-Barbero, J.; Pardo, L.; Rodríguez, R. E.; Arsequell, G.; Valencia, G. Modulation of the Interaction between a Peptide Ligand and a G Protein-Coupled Receptor by Halogen Atoms. *ACS Med. Chem. Lett.* **2015**, 6 (8), 872–876.
- (32) Toth, G.; Kramer, T. H.; Knapp, R.; Lui, G.; Davis, P.; Burks, T. F.; Yamamura, H. I.; Hruby, V. J. [D-Pen<sup>2</sup>,D-Pen<sup>5</sup>]Enkephalin Analogues with Increased Affinity and Selectivity for Delta Opioid Receptors. *J. Med. Chem.* **1990**, 33 (1), 249–253.
- (33) Weber, S. J.; Greene, D. L.; Sharma, S. D.; Yamamura, H. I.; Kramer, T. H.; Burks, T. F.; Hruby, V. J.; Hersh, L. B.; Davis, T. P. Distribution and Analgesia of [3H][D-Pen<sup>2</sup>, D-Pen<sup>5</sup>]Enkephalin and Two Halogenated Analogs after Intravenous Administration. *J. Pharmacol. Exp. Ther.* **1991**, 259 (3), 1109–1117.
- (34) Weber, S. J.; Greene, D. L.; Hruby, V. J.; Yamamura, H. I.; Porreca, F.; Davis, T. P. Whole Body and Brain Distribution of [3H]Cyclic [D-Pen<sup>2</sup>,D-Pen<sup>5</sup>] Enkephalin after Intraperitoneal, Intravenous, Oral and Subcutaneous Administration. *J. Pharmacol. Exp. Ther.* **1992**, 263 (3), 1308–1316.
- (35) Abbruscato, T. J.; Williams, S. A.; Misicka, A.; Lipkowski, A. W.; Hruby, V. J.; Davis, T. P. Blood-to-Central Nervous System Entry and Stability of Biphalin, a Unique Double-

- Enkephalin Analog, and Its Halogenated Derivatives. *J. Pharmacol. Exp. Ther.* **1996**, 276 (3), 1049–1057.
- (36) Shenmar, K.; Sharma, K. K.; Wangoo, N.; Maurya, I. K.; Kumar, V.; Khan, S. I.; Jacob, M. R.; Tikoo, K.; Jain, R. Synthesis, Stability and Mechanistic Studies of Potent Anticryptococcal Hexapeptides. *Eur. J. Med. Chem.* **2017**, 132, 192–203.
- (37) Mahindra, A.; Sharma, K. K.; Jain, R. Rapid Microwave-Assisted Solution-Phase Peptide Synthesis. *Tetrahedron Lett.* **2012**, 53 (51), 6931–6935.
- (38) Weinberger, S. B.; Martinez, J. L. J. Characterization of Hydrolysis of [ Leu ] Enkephalin in Rat Plasma. *J. Pharmacol. Exp. Ther.* **1988**, 247, 129–135.
- (39) Roques, B.; Noble, F. Dual Inhibitors of Enkephalin-Degrading Enzymes (Neutral Endopeptidase 24.11 and Aminopeptidase N) as Potential New Medications in the Management of Pain and Opioid Addiction. *NIDA Res. Monogr.* **1995**, 147, 104–145.
- (40) Suzanne, E. T.; Kenneth, L. A. Leucine-Enkephalin Metabolism in Brain Microvessel Endothelial Cells. *Peptides* **1994**, 15 (1), 109–116.
- (41) Sarin, V. K.; Kent, S. B.; Tam, J. P.; Merrifield, R. B. Quantitative Monitoring of Solid-Phase Peptide Synthesis by the Ninhydrin Reaction. *Anal. Biochem.* **1981**, 117 (1), 147–157.
- (42) Beaudeau, J.-L.; Blais, V.; Holleran, B. J.; Bergeron, A.; Pineyro, G.; Guerin, B.; Gendron, L.; Dory, Y. L. N-Guanidyl and C-Tetrazole Leu-Enkephalin Derivatives: Efficient Mu and Delta Opioid Receptor Agonists with Improved Pharmacological Properties. *ACS Chem. Neurosci.* **2019**, 10 (3), 1615–1626.
